# Supplementary material for: VdGAL4 Modulates Microsclerotium Formation, Conidial Morphology, and Germination To Promote Virulence in Verticillium dahliae
Source: PubMed Central journal article supplement (PMC9927093; doi:10.1128/spectrum.03515-22), 2022-12-07
Supplement: spectrum.03515-22-s0001.pdf [file spectrum.03515-22-s0001.pdf]

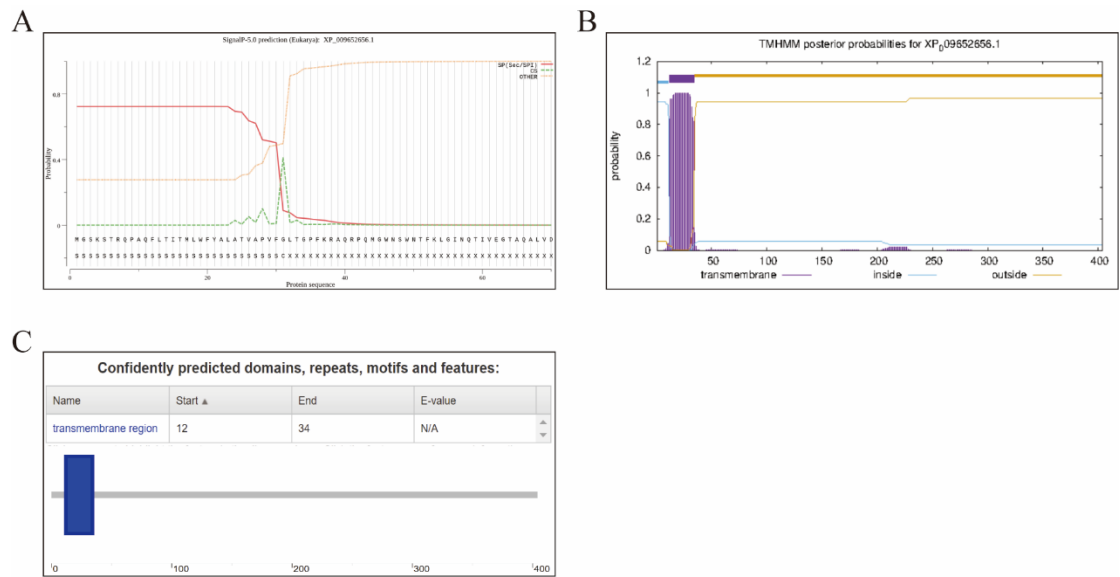

**FIG S1** Bioinformatics analysis of VdGAL4. (A) The signal peptide sites of VdGAL4 protein. (B) Transmembrane domain analysis of VdGAL4. (C) The conserved domain of VdGAL4.

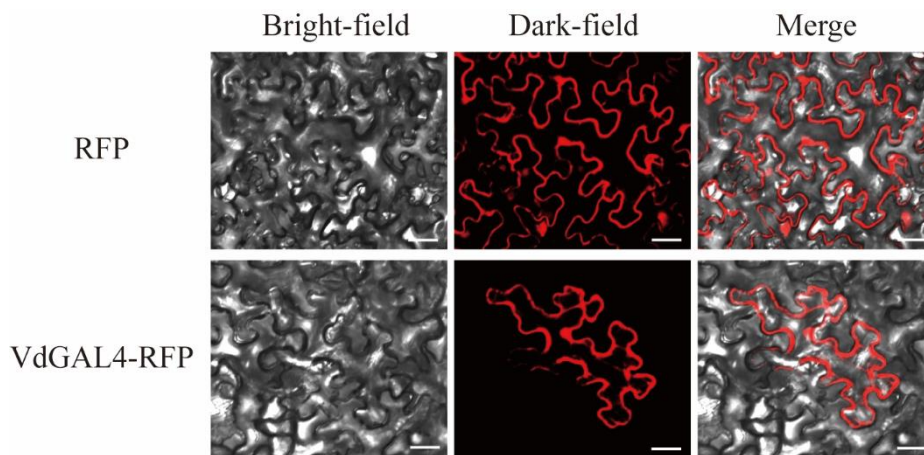

**FIG S2** Subcellular localizations of VdGAL4 in *N. benthamiana* on *A. tumefaciens*-mediated transient expression. Fluorescence was detected by confocal microscopy after 48 h of injection.

Scale bar = 100  $\mu$ m.

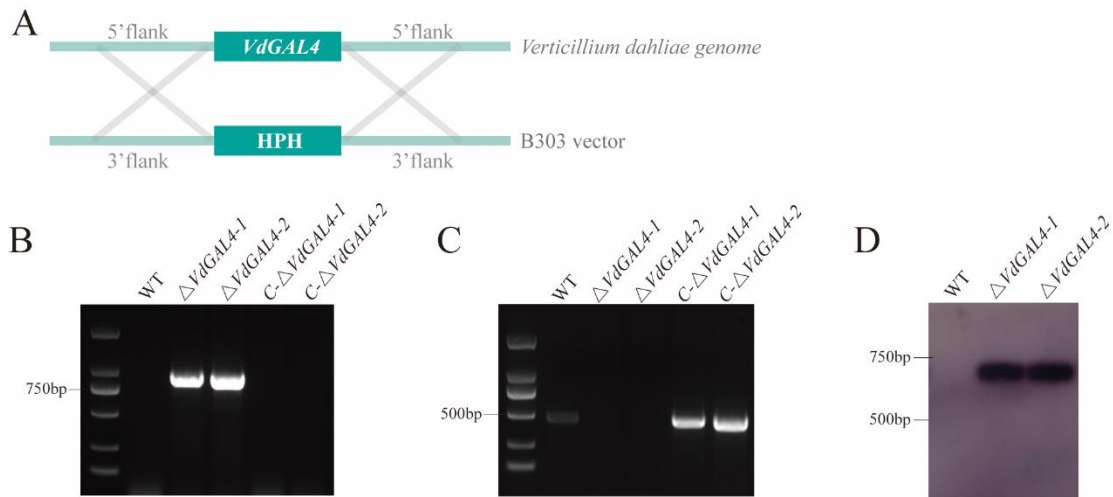

**FIG S3** Identification of deletion and complementary mutants. (A) The principle of obtaining the mutant of *VdGAL4* by homologous recombination method. (B) The deletion mutant strains of *VdGAL4* were determined by PCR. (C) The complementary mutant strains of *VdGAL4* were determined by PCR. (D) Southern blotting was used to identify the deletion mutant strains.

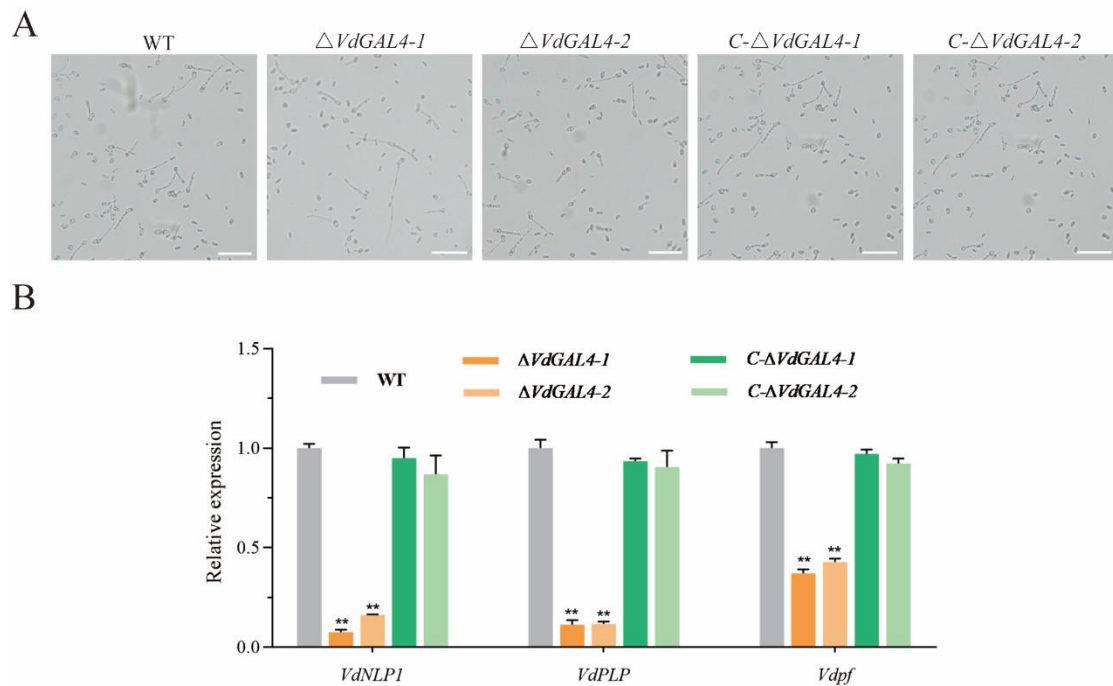

**FIG S4** (A) The conidia of WT,  $\Delta VdGAL4$  and C- $\Delta VdGAL4$  strains germinated at 25°C. Bar = 200  $\mu$ m.

(B) Assays of the relative expression of conidia-related genes in all tested strains by RT-qPCR. The error bar represents standard error of means. \*p < 0.05, \*\*p < 0.01.

**Table S1:** Primers used in this study.

| Primer name           | Sequence (5'-3')                                 | Enzyme loci | Purpose                       |
|-----------------------|--------------------------------------------------|-------------|-------------------------------|
| pGR107-VdGAL1-F       | GGTCAGCACCAGCTAGCATCGATATGGGTG<br>TCATTGCAAC     | Cla I       |                               |
| pGR107-VdGAL1-R       | TCGCCCTTGCTCACCATCCCGGGCTCGGTCT<br>CCTGATCAGCCAG | SmaI I      |                               |
| pGR107-VdGAL2-F       | GGTCAGCACCAGCTAGCATCGATATGCCTTC<br>CAACACAGCG    | Cla I       |                               |
| pGR107-VdGAL2-R       | TCGCCCTTGCTCACCATCCCGGGCGCATAAG<br>TCGGAAGCCTAC  | SmaI I      |                               |
| pGR107-VdGAL3-F       | GGTCAGCACCAGCTAGCATCGATATGGCAC<br>CACTTGCCACA    | Cla I       |                               |
| pGR107-VdGAL3-R       | TCGCCCTTGCTCACCATCCCGGGCAGTCCT<br>CCTTGATCATGGA  | SmaI I      | Transient gene expression     |
| pGR107-VdGAL4-F       | GGTCAGCACCAGCTAGCATCGATATGGGTTC<br>AAAGTCCACT    | Cla I       |                               |
| pGR107-VdGAL4-R       | TCGCCCTTGCTCACCATCCCGGGCAAGAA<br>AGCAGCAACACCTT  | SmaI I      |                               |
| pGR107-VdGAL5-F       | GGTCAGCACCAGCTAGCATCGATATGGCCC<br>GAACTCCACC     | Cla I       |                               |
| pGR107-VdGAL5-R       | TCGCCCTTGCTCACCATCCCGGGCAGTCAT<br>CCTTTTCTCGCG   | SmaI I      |                               |
| pGR107-VdGAL4(Δ SP)-F | GGTCAGCACCAGCTAGCATCGATATGACTG<br>ACCGTCTTTTC    | Cla I       |                               |
| pGR107-VdGAL4(Δ SP)-R | TCGCCCTTGCTCACCATCCCGGGCAAGAA<br>AGCAGCAACACCTT  | SmaI I      |                               |
| pSUC2-VdGAL4(SP)-F    | CCGGAATTCATGGGTTCAAAGTCC                         | EcoR I      | Yeast signal trap system      |
| pSUC2-VdGAL4(SP)-R    | CCGCTCGAGCCCGAAAACGGGAGC                         | Xho I       |                               |
| PBI121(RFP)-VdGAL4-F  | AGAACACGGGGGACTCTAGAATGAAATTTA<br>CCGGCCTTGCTTCG | Xba I       | Subcellular localization      |
| PBI121(RFP)-VdGAL4-R  | GTTTTGTTAATTAAGGATCCGAAGGTCAGC<br>GTCTGGCC       | BamH I      |                               |
| TRV-BAK1-F            | CGGGATCCGTGAGGGTGGTGAGCGGGATA<br>AT              |             |                               |
| TRV-BAK1-R            | CGGAATTCGCTCATAACTGGGCAAAGGGCT<br>T              |             | VIGS in <i>N. benthamiana</i> |
| TRV-SOBIR1-F          | CGGGATCCAATCTTTATCCACCAGATCATGC                  |             |                               |
| TRV-SOBIR1-R          | CGGAATTCAGAAAGTTTTCCAATGGCAG                     |             |                               |

|                               |                                                       |          |                                                |
|-------------------------------|-------------------------------------------------------|----------|------------------------------------------------|
| qPCR- <i>NbActin</i> -F       | TGGTCGTACCACCGGTATTGTGTT                              |          |                                                |
| qPCR- <i>NbActin</i> -R       | TCACTTGCCCATCAGGAAGCTCAT                              |          |                                                |
| qPCR- <i>NbBAK1</i> -F        | GAGGTGGGAGGAATGGCAA                                   |          |                                                |
| qPCR- <i>NbBAK1</i> -R        | TTGCCCCGACAATTCATCT                                   |          |                                                |
| qPCR- <i>NbSOBIR1</i> -F      | CCAGCAAGTCACAGAAGGGA                                  |          |                                                |
| qPCR- <i>NbSOBIR1</i> -R      | CCAACACCACACCAAAGCTG                                  |          |                                                |
| B303- <i>VdGAL4</i> -UP-F     | GGACCGACGGGGCGGT <u>ACC</u> CCAGGATTC<br>GATCAATAATAT | Kpn I    |                                                |
| B303- <i>VdGAL4</i> -UP-R     | CTTCAATATCAGTTAACGTCTTCTCCTTGTT<br>CAAAGTCCA          |          |                                                |
| B303- <i>VdGAL4</i> -Hyg-F    | TGGACTTTGAACAAGGAGAAAGACGTTAAC<br>TGATATTGAAG         |          | Generation of<br><i>VdGAL4</i> deletion        |
| B303- <i>VdGAL4</i> -Hyg-R    | CTGACTGAATTATTTCTTTACTATTCTTTG<br>CCCTCGGACG          |          | mutant in <i>V.</i><br><i>dahliae</i>          |
| B303- <i>VdGAL4</i> -Down-F   | CGTCCGAGGGCAAAGGAATAGTAAAGGAA<br>ATAATTCAGTCAG        |          |                                                |
| B303- <i>VdGAL4</i> -Down-R   | TAGTCCCGGGTCTTAATTAACGTGAAAGACC<br>AGCCAATGGC         | Pac I    |                                                |
| pSULPH- <i>VdGAL4</i> (+UP)-F | ACGGCCAGTGCCAAGCTTCCAGGATTCGAT<br>CAATAA              | BamH I   | Generation of<br><i>VdGAL4</i>                 |
| pSULPH- <i>VdGAL4</i> (+UP)-R | ATTCACTAGTCAGGATCCCTGCAAGAAAGC<br>AGCAACACCTTG        | Hind III | complementation<br>mutant in <i>V. dahliae</i> |
| Test-Hyg-F                    | TCGTTATGTTTATCGGCACT                                  |          |                                                |
| Test-Hyg-F                    | TCGGTCGGCATCTACTCT                                    |          |                                                |
| Test- <i>VdGAL4</i> -F        | GGACATCCACGCCAAGTT                                    |          | Validation of<br><i>VdGAL4</i> deletion        |
| Test- <i>VdGAL4</i> -R        | TCAGAGCAAGCGCAACAT                                    |          | and<br>complementation                         |
| Test-Hyg- southern -F         | TCGCCCTTCCTCCCTTTA                                    |          | mutant in <i>V. dahliae</i>                    |
| Test-Hyg- southern -R         | CGCTGTTATGCGGCCATT                                    |          |                                                |
| <i>β-tubulin</i> -F           | TCACCAGCCGTGGCAAGGTTG                                 |          |                                                |
| <i>β-tubulin</i> -R           | AGCAAAGGGCGGTCTGGACGTTG                               |          |                                                |
| <i>GhUBQ7</i> -F              | GAAGGCATTCCACCTGACCAAC                                |          | Quantification of<br>fungal biomass            |
| <i>GhUBQ7</i> -R              | CTTGACCTTCTTCTTGTGCTTG                                |          |                                                |
| <i>VdNLP1</i> -F              | TCGGTCTTGGCCCTCGTC                                    |          | qPCR of genes                                  |

|                   |                           |                                                  |
|-------------------|---------------------------|--------------------------------------------------|
| <i>VdNLP1</i> -R  | GCCTGGTTTGC GTTGTTC       | related conidial<br>production                   |
| <i>VdPLP</i> -F   | GCTGACCAGTATCTGTCTGGAGG   |                                                  |
| <i>VdPLP</i> -R   | ATGACGACTGGCTTCTCGGCCT    |                                                  |
| <i>Vdpcf</i> -F   | ACCATTTTCAACAGTCGGGTACGCG |                                                  |
| <i>Vdpcf</i> -R   | ACCATTTTCAACAGTCGGGTACGCG |                                                  |
| <i>VdNoxB</i> -F  | TGCGTGCCAAGCATAAGACATAC   |                                                  |
| <i>VdNoxB</i> -R  | GACAGCACGAGTGAAATCACCAAC  |                                                  |
| <i>VdPls1</i> -F  | ATGGTCAACAAGATCCTCGCGA    |                                                  |
| <i>VdPls1</i> -R  | TCCGGCTGCTCAAACATGTTGT    |                                                  |
| <i>VdSep5</i> -F  | AGCTCGACCTGGACGAGGA       |                                                  |
| <i>VdSep5</i> -R  | GAGGCTTCGTTATCAATCTCGTCTC |                                                  |
| <i>VdCrz1</i> -F  | ATGGATCAGCAAGCTCAACATCG   | qPCR of genes<br>related mycelial<br>penetration |
| <i>VdCrz1</i> -R  | GATCCAGACCGAGACCGAGAC     |                                                  |
| <i>VdCSIN1</i> -F | CTTTGATTGTGGTATGGGTTCT    |                                                  |
| <i>VdCSIN1</i> -R | GTGGTGGGTTTGCCTTGT        |                                                  |
| <i>Som1</i> -F    | GTCGTGACAACCGAAAGCAG      |                                                  |
| <i>Som1</i> -R    | TCCCTCGTGGAGCGCAA         |                                                  |
| <i>Vta3</i> -F    | GATGTCTGCCCTGCGTAA        |                                                  |
| <i>Vta3</i> -R    | GATCTGAGCCTGGTCAAAGT      |                                                  |
| <i>Vayg1</i> -F   | GTTGCGACGAGTTCTTGT        |                                                  |
| <i>Vayg1</i> -R   | ACCATCACCTTGCCATA         |                                                  |
| <i>VT4HR</i> -F   | TGGTGGCATCAAGACAGACA      | qPCR of genes<br>related melanin<br>formation    |
| <i>VT4HR</i> -R   | CGAAGCGAGGAAGCAAACAA      |                                                  |
| <i>VafIM</i> -F   | GACTGTCAATGCCATCGCC       |                                                  |
| <i>VafIM</i> -R   | CGGTGACCTTGATAACTT        |                                                  |
| <i>VdSCD</i> -F   | ATGCCCGCTTCGAGTTC         |                                                  |

---

*VdSCD-R* TTCCACACGCCGTCATCTT

---

*VDH1-F* GTCTATTCATCTGGTTCCTCCCTA

---

*VDH1-R* CAAACCTCTTACAATGTTGACGC

---

*VdLAC-F* CGTTTCCTCACTTTAGCCACAGC

---

*VdLAC-R* CACCCAGTCCACCGTCCATTGT

---
